# Supplementary material
Source: PubMed Central journal article supplement (PMC2546360)

**Structure of the 1,*N*<sup>2</sup>-Etheno-2'-deoxyguanosine Adduct in Duplex DNA at pH 8.6<sup>†</sup>**

Revised Manuscript

Supporting Information

Ganesh Shanmugam<sup>‡</sup>, Angela K. Goodenough<sup>‡</sup>, Ivan D. Kozekov<sup>‡</sup>, F. Peter  
Guengerich<sup>||</sup>, Carmelo J. Rizzo<sup>‡</sup>, and Michael P. Stone<sup>\*.‡</sup>

Departments of Chemistry and Biochemistry, Vanderbilt Institute of Chemical Biology,  
Center in Molecular Toxicology, and the Vanderbilt-Ingram Cancer Center, Vanderbilt  
University, Nashville, Tennessee 37235

<sup>‡</sup>Department of Chemistry

<sup>||</sup>Department of Biochemistry

\*Author to whom correspondence should be addressed. (615) 322-2589; (615) 322-7591  
(FAX); michael.p.stone@vanderbilt.edu

Running Title: 1,*N*<sup>2</sup>-εdG Adduct in Duplex DNA

<sup>†</sup>We congratulate Professor Lawrence J. Marnett upon the occasion of his sixtieth  
birthday.

**Table S1.** Non-exchangeable Proton Chemical Shifts<sup>a</sup> of 1,*N*<sup>2</sup>- $\epsilon$ dG duplex in D<sub>2</sub>O<sup>b</sup> at pH 8.6, 7 °C.

| Nucleotide      | H8   | H6   | H1'  | H2'  | H2'' | H3'  | H5/H2/CH <sub>3</sub> |
|-----------------|------|------|------|------|------|------|-----------------------|
| C <sup>1</sup>  |      | 7.68 | 5.78 | 2.03 | 2.46 | 4.75 | 5.94                  |
| G <sup>2</sup>  | 8.02 |      | 5.94 | 2.72 | 2.79 | 5.02 |                       |
| C <sup>3</sup>  |      | 7.44 | 5.65 | 2.13 | 2.44 | 4.89 | 5.49                  |
| A <sup>4</sup>  | 8.37 |      | 6.24 | 2.68 | 2.91 | 5.02 | 7.22                  |
| T <sup>5</sup>  |      | 7.06 | 5.78 | 1.74 | 2.09 | 4.79 | 1.50                  |
| X <sup>6</sup>  | 7.94 |      | 5.12 | 2.34 | 2.14 | 4.83 |                       |
| G <sup>7</sup>  | 7.84 |      | 5.45 | 2.74 | 2.77 | 5.02 |                       |
| A <sup>8</sup>  | 8.18 |      | 5.92 | 2.77 | 2.87 | 5.08 | 7.22                  |
| A <sup>9</sup>  | 8.19 |      | 6.22 | 2.60 | 2.93 | 5.00 | 7.75                  |
| T <sup>10</sup> |      | 7.18 | 5.92 | 2.09 | 2.50 | 4.87 | 1.33                  |
| C <sup>11</sup> |      | 7.59 | 6.06 | 2.23 | 2.50 | 4.85 | 5.65                  |
| C <sup>12</sup> |      | 7.67 | 6.26 | 2.28 | 2.28 | 4.59 | 5.77                  |
| G <sup>13</sup> | 7.88 |      | 5.67 | 2.56 | 2.74 | 4.85 |                       |
| G <sup>14</sup> | 7.89 |      | 5.69 | 2.74 | 2.83 | 5.06 |                       |
| A <sup>15</sup> | 8.29 |      | 6.33 | 2.74 | 2.99 | 5.08 | 7.89                  |
| T <sup>16</sup> |      | 7.23 | 6.00 | 2.03 | 2.60 | 4.89 | 1.33                  |
| T <sup>17</sup> |      | 7.39 | 6.10 | 2.13 | 2.52 | 4.98 | 1.56                  |
| C <sup>18</sup> |      | 7.66 | 6.14 | 2.36 | 2.40 | 4.96 | 5.77                  |
| C <sup>19</sup> |      | 7.63 | 6.04 | 1.91 | 2.25 | 4.79 | 5.79                  |
| A <sup>20</sup> | 8.51 |      | 6.31 | 2.81 | 3.01 | 5.06 | 7.54                  |
| T <sup>21</sup> |      | 7.14 | 5.73 | 2.07 | 2.42 | 4.89 | 1.42                  |
| G <sup>22</sup> | 7.91 |      | 5.86 | 2.64 | 2.70 | 4.98 |                       |

---

|                 |      |      |      |      |      |      |
|-----------------|------|------|------|------|------|------|
| C <sup>23</sup> | 7.40 | 5.77 | 1.93 | 2.36 | 4.85 | 5.43 |
| G <sup>24</sup> | 7.98 | 6.18 | 2.38 | 2.64 | 4.71 |      |

---

<sup>a</sup> Values in parts per million. <sup>b</sup>10 mM phosphate buffer in D<sub>2</sub>O, 100 mM NaCl, pH 8.6.

Etheno protons H7 and H6 observed at 6.54 and 6.21 ppm, respectively.

**Table S2.** Exchangeable Proton Chemical Shifts<sup>a</sup> of 1,*N*<sup>2</sup>- $\epsilon$ dG duplex in H<sub>2</sub>O<sup>b</sup> at pH 8.6, 7 °C.

| Base Pair                        | C N <sup>4</sup> H <sub>nhb</sub> | C N <sup>4</sup> H <sub>hb</sub> | G N1H | T N3H |
|----------------------------------|-----------------------------------|----------------------------------|-------|-------|
| C <sup>1</sup> •G <sup>24</sup>  | 7.14                              | 8.17                             |       |       |
| G <sup>2</sup> •C <sup>23</sup>  | 6.67                              | 8.48                             | 13.1  |       |
| C <sup>3</sup> •G <sup>22</sup>  | 6.60                              | 8.40                             | 12.7  |       |
| A <sup>4</sup> •T <sup>21</sup>  |                                   |                                  |       | 13.5  |
| T <sup>5</sup> •A <sup>20</sup>  |                                   |                                  |       | 13.4  |
| X <sup>6</sup> •C <sup>19</sup>  | nd                                | nd                               | nd    |       |
| G <sup>7</sup> •C <sup>18</sup>  | 6.91                              | 7.97                             | 12.0  |       |
| A <sup>8</sup> •T <sup>17</sup>  |                                   |                                  |       | 13.8  |
| A <sup>9</sup> •T <sup>16</sup>  |                                   |                                  |       | 13.7  |
| T <sup>10</sup> •A <sup>15</sup> |                                   |                                  |       | 13.6  |
| C <sup>11</sup> •G <sup>14</sup> | 6.71                              | 8.40                             | 12.8  |       |
| C <sup>12</sup> •G <sup>13</sup> | 7.17                              | 8.33                             |       |       |

<sup>a</sup> Values in parts per million. <sup>b</sup>10 mM phosphate buffer in H<sub>2</sub>O, 100 mM NaCl, pH 8.6. nh and nhb refer to the hydrogen-bonded and non-hydrogen bonded cytidine amino protons, respectively. nd, not detected.

**Table S3.** Distribution of Experimental NOE Restraints Among Nucleotide Units of the 1,*N*<sup>2</sup>- $\epsilon$ dG duplex<sup>a</sup> in D<sub>2</sub>O Buffer at pH 8.6.

| Nucleotide      | Number of Restraints |                               |              |       |
|-----------------|----------------------|-------------------------------|--------------|-------|
|                 | intra-nucleotide     | inter-nucleotide <sup>b</sup> | Cross-strand | Total |
| C <sup>1</sup>  | 20                   | 4                             | 0            | 24    |
| G <sup>2</sup>  | 7                    | 13                            | 0            | 20    |
| C <sup>3</sup>  | 9                    | 14                            | 0            | 24    |
| A <sup>4</sup>  | 9                    | 15                            | 1            | 25    |
| T <sup>5</sup>  | 12                   | 13                            | 0            | 25    |
| X <sup>6</sup>  | 11                   | 6                             | 6            | 23    |
| G <sup>7</sup>  | 7                    | 7                             | 0            | 14    |
| A <sup>8</sup>  | 10                   | 9                             | 0            | 19    |
| A <sup>9</sup>  | 9                    | 15                            | 2            | 26    |
| T <sup>10</sup> | 10                   | 17                            | 0            | 27    |
| C <sup>11</sup> | 9                    | 13                            | 1            | 23    |
| C <sup>12</sup> | 8                    | 6                             | 0            | 14    |
| G <sup>13</sup> | 16                   | 3                             | 0            | 19    |
| G <sup>14</sup> | 8                    | 7                             | 0            | 15    |
| A <sup>15</sup> | 11                   | 15                            | 2            | 28    |
| T <sup>16</sup> | 10                   | 21                            | 0            | 31    |
| T <sup>17</sup> | 8                    | 16                            | 1            | 25    |
| C <sup>18</sup> | 6                    | 8                             | 0            | 14    |
| C <sup>19</sup> | 11                   | 7                             | 2            | 20    |
| A <sup>20</sup> | 11                   | 16                            | 1            | 28    |
| T <sup>21</sup> | 9                    | 14                            | 0            | 23    |
| G <sup>22</sup> | 7                    | 11                            | 0            | 18    |

|                 |   |    |   |    |
|-----------------|---|----|---|----|
| C <sup>23</sup> | 9 | 13 | 0 | 22 |
| G <sup>24</sup> | 9 | 5  | 0 | 14 |

<sup>a</sup>Nucleotides C<sup>1</sup>→C<sup>12</sup> and G<sup>13</sup>→G<sup>24</sup> are in the modified and complimentary strand, respectively. <sup>b</sup>The internucleotide NOEs includes both 3'- and 5'-neighbors.

**Figure S1.** NOE cross peak intensities between the base protons and the sugar H1' protons of the attached deoxyribose moieties. **A.** The modified strand. **B.** The complementary strand. Black bars represent intraresidue cross-peaks. Gray bars represent interresidue cross-peaks.

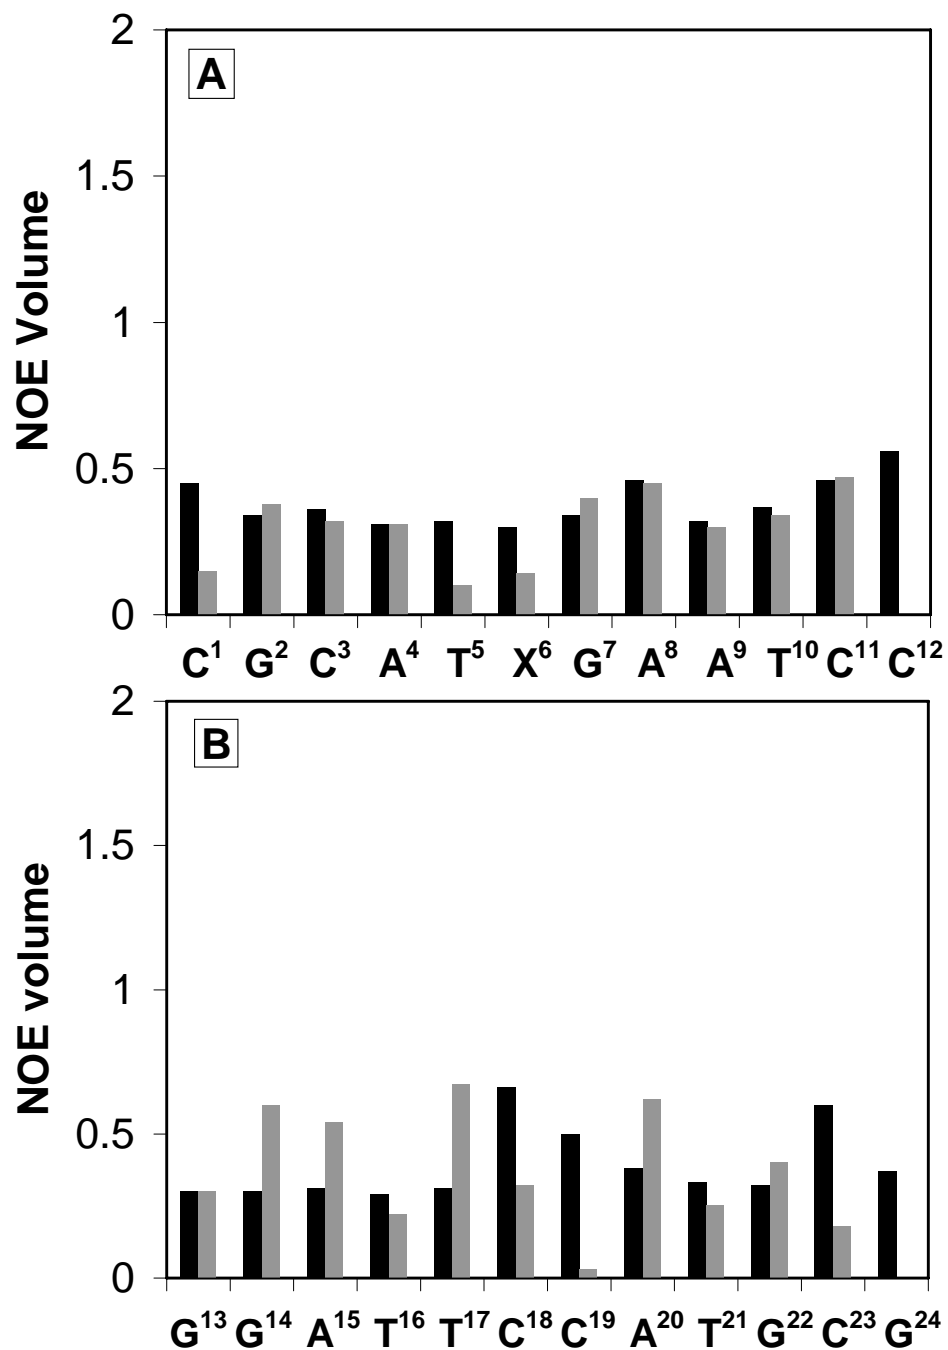

**Figure S2.** The partial charges assigned to the 1,*N*<sup>2</sup>- $\epsilon$ dG adduct, calculated using the RESP protocol in the program GAUSSIAN98.

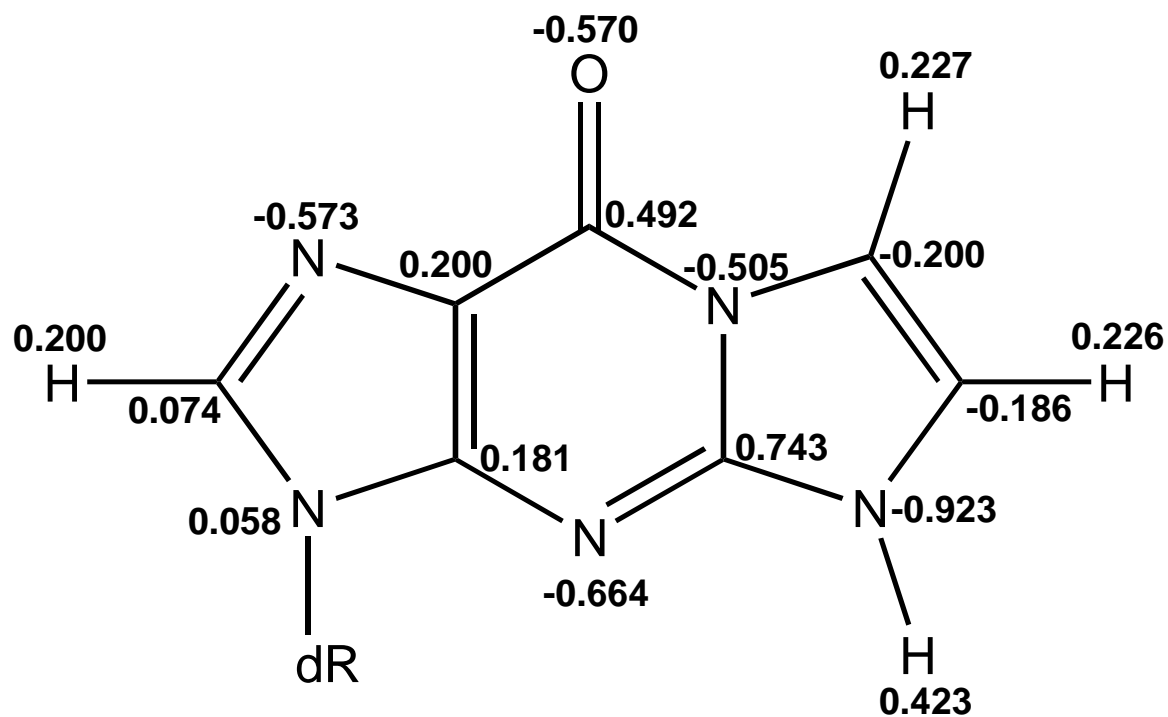

Supplement: NIHMS62802-supplement-1.pdf [file NIHMS62802-supplement-1.pdf]
